# Supplementary material
Source: publisher site journal article supplement (https://www.dovepress.com/article/401754)
Supplement: Supplementary file 1 [file get_supplementary_file.php]

**Supplementary Material**

**Table S1.** Baseline data, intensive care unit length of stay, hospital length of stay, intensive care unit mortality, and hospital mortality among adult critically ill patients with sepsis from the community (n = 864)

| Age, years, mean (SD)  Above 60 years, n (%) | 65.2 (21.3)  507 (58.7) |
| --- | --- |
| Female gender, n (%) | 485 (56.1) |
| Referrer, n (%)  Emergency Department  Ward  Nursing home or long-term care facility  Surgery room | 637 (73.1)  150 (17.3)  69 (8.0)  8 (0.9) |
| Site of primary infection, n (%)  Lung  Urinary tract  Digestive/Abdominal cavity Skin and soft tissue  Othersa | 497 (57.5)  155 (17.9)  85 (9.8)  37 (4.3)  90 (10.4) |
| MDRO bacterial infection at hospital admission, n (%) | 85 (9.8) |
| APACHE II, mean (SD)  Above 16, n (%) | 15.1 (7.3)  393 (45.5) |
| Functional independence, n (%) | 331 (38.3) |
| SOFA, median (IQR 25–75%)  Two or more organ failure, n (%) | 2.0 (2.0–4.0)  513 (59.4) |
| Comorbidities, n (%)  Diabetes mellitus  Immunosupression  Neoplasm  Psychiatric Disease  Congestive heart failure  Chronic kidney disease  Chronic kidney disease on RRT  COPD  Stroke with permanent sequel  Dementia  Liver cirrhosis | 238 (27.5)  208 (24.1)  163 (18.9)  116 (13.4)  91 (10.5)  73 (8.4)  24 (2.8)  67 (7.8)  48 (5.6)  37 (4.3)  4 (0.5) |
| Hypoxemic acute respiratory failure, n (%) | 158 (18.3) |
| Vasopressor on the first hour of ICU admission, n (%) | 42 (4.9) |
| Axillary temperature, median (IQR 25–75%)  Below 35oC, n (%)  Above 38oC, n (%) | 36.1 (35.8–36.6)  23 (2.7)  29 (3.4) |
| Glasgow Coma Score, median (IQR 25–75%)  Below 15, n (%) | 15 (14–15)  234 (27.5) |
| Hemoglobin, g/dL, median (IQR 25–75%)b  Below 10.0 g/dL, n (%) | 12.0 (10.0–13.0)  198 (22.9) |
| Leukocytes count, leukocytes/mm3, median (IQ 25–75%)  Less than 4,500 leukocytes/mm3, n (%)  More than 11,000 leukocytes/mm3, n (%) | 8.8 (6.0–13.0)  127 (14.7)  303 (35.1) |
| Platelets count, platelets/mm3, median (IQR 25–75%)  Lower than 200,000 platelets/mm3, n (%) | 195,000 (152,000–251,7750)  455 (52.7) |
| Serum creatinine, mg/dL, median (IQR 25–75%)c  Above 1.4 mg/dL, n (%)b | 1.0 (1.0–1.0)  186 (21.6) |
| Arterial lactate, mg/dL, median (IQR 25–75%)  Above 2.0 mg/dL, n (%) | 1.0 (1.0–2.0)  283 (32.8) |
| ICU-LOS, days, median (IQR 25–75%) | 5.0 (3.0–9.0) |
| Hospital-LOS, days, median (IQR 25–75%) | 8.0 (6.0–15.0) |
| ICU mortality, n (%) | 85 (9.8) |
| Hospital mortality, n (%) | 100 (11.6) |

**Notes:** a Gynecologic/obstetric, central nervous system, bone, joints, endocarditis, and unknown origin. b Hemoglobin was not reported in 20 patients. c Serum creatinine was not reported in one patient.

**Abbreviations:** APACHE II: Acute Physiology and Chronic Health Evaluation II; MDRO: multidrug-resistant organisms, SOFA: Sequential Organ Failure Assessment; RRT: Renal replacement therapy; COPD: Chronic obstructive pulmonary disease; ICU: Intensive care unit; ICU-LOS: Intensive care unit length of stay; Hospital-LOS: Hospital length of stay; SD: Standard deviation; IQR 25–75%: interquartile range 25–75%.

**Table S2.** Site of primary infection and microbiological agents among patients with multidrug-resistant organisms infection on intensive care unit admission (n = 85)

| Site of primary infection, n (%) (overall events = 85)  Lung  Urinary tract  Digestive/Abdominal cavity  Skin and soft tissue  Bone and joints  Gynecological / Obstetric  Central nervous system  Bacteremia of unknown origin  Endocarditis | 50 (58.8)  16 (18.8)  9 (10.6)  3 (3.5)  3 (3.5)  1 (1.2)  1 (1.2)  1 (1.2)  1 (1.2) |
| --- | --- |
| MDRO bacteria, n (%) (overall events = 114)  ESBL  Oxacillin-resistant coagulase-negative staphylococci  MRSA  KPC  Pan-resistant enterobacteria  VRE  *Acinetobacter* spp / *Pseudomonas* spp non-KPC  Others | 64 (56.1)  17 (14.9)  10 (8.8)  7 (6.1)  6 (5.3)  3 (2.6)  2 (1.8)  5 (4.4) |

**Abbreviations:** MDRO: Multidrug-resistant organisms; ESBL: Extended-spectrum beta-lactamase *Enterobacteriaceae;* MRSA: Methicillin-resistant Staphylococcusaureus; KPC: *Pseudomonas* spp, *Acinetobacter* spp or enterobacteria producing carbapenemase; VRE: Vancomycin-resistant *Enterococcus*.

**Table S3.** Univariate analysis of intensive care unit length of stay, hospital length of stay, intensive care unit, and hospital mortality between patients with and without MDRO bacterial infection at hospital admission (n = 864)

| Variable | MDRO bacterial infection  (n = 85) | Without MDRO bacterial infection  (n = 792) | *p*-value |
| --- | --- | --- | --- |
| ICU-LOS, days, median (IQR 25–75%) | 13.0 (6.5–29.5) | 4.0 (3.0–8.0) | < 0.01 |
| Hospital-LOS, days, median (IQR 25–75%) | 20.0 (11.0–42.5) | 8.0 (5.0–7.0) | < 0.01 |
| ICU mortality, n (%) | 22 (25.0) | 63 (8.1) | < 0.01 |
| Hospital mortality, n (%) | 25 (29.4) | 75 (9.5) | < 0.01 |

**Abbreviations:** ICU: Intensive care unit; ICU-LOS: Intensive care unit length of stay; Hospital-LOS: Hospital length of stay; MDRO: Multidrug-resistant organisms; IQR 25–75%: interquartile range 25–75%.
